# Supplementary material for: Formation of size-tunable dandelion-like hierarchical rutile titania nanospheres for dye-sensitized solar cells
Source: Royal Society of Chemistry journal article supplement (doi:10.1039/c2ra22807f), 2012-11-08
Supplement: c2ra22807f.pdf [file c2ra22807f.pdf]

Electronic Supplementary Information

for

**Formation of Size-tunable Dandelion-like Hierarchical Rutile  
Titania Nanospheres for Dye-sensitized Solar Cells**

Chi-Ming Lan, Shang-En Liu, Jia-Wei Shiu, Jyun-Yu Hu, Meng-Hung Lin and Eric

Wei-Guang Diao\*

*Department of Applied Chemistry and Institute of Molecular Science, National Chiao  
Tung University, Hsinchu 30010, Taiwan; Fax: +886-3-5723764; Tel: +886-3-5131524*

*E-mail: [diao@mail.nctu.edu.tw](mailto:diao@mail.nctu.edu.tw)*

**Table S1.** Photovoltaic parameters of devices with Z907 dye made of TiO<sub>2</sub> scatter pastes – ED25, ED20, ED15, ED10 and ED5 with the same fabricated TiO<sub>2</sub> films (14+5 μm) without TiCl<sub>4</sub> post-treatment under simulated AM-1.5G one-sun illumination (power 100 mW cm<sup>-2</sup>) and active area 0.16 cm<sup>2</sup>.

| DHRS LSL | $J_{sc}$<br>/mA cm <sup>-2</sup> | $V_{oc}$<br>/mV | FF    | $\eta$<br>/% |
|----------|----------------------------------|-----------------|-------|--------------|
| ED5      | 13.7                             | 820             | 0.750 | 8.4          |
| ED10     | 13.6                             | 814             | 0.758 | 8.4          |
| ED15     | 14.0                             | 809             | 0.740 | 8.4          |
| ED20     | 14.1                             | 807             | 0.759 | 8.6          |
| ED25     | 14.0                             | 795             | 0.759 | 8.5          |

**Table S2.** Photovoltaic parameters of DSSC with devices made of Z907 dye and various scattering TiO<sub>2</sub> pastes – PST-400C, 18NR-AO, R/SP and ED20 – with the TiCl<sub>4</sub> post-treatment under simulated AM-1.5G illumination (power 100 mW cm<sup>-2</sup>) and active area 0.16 cm<sup>2</sup> with a shadow mask 0.25 cm<sup>2</sup>.

| LSL      | Working Electrode <sup>a</sup> | <i>J</i> <sub>sc</sub> /mA cm <sup>-2</sup> | <i>V</i> <sub>oc</sub> /mV | FF         | <i>η</i> /% |
|----------|--------------------------------|---------------------------------------------|----------------------------|------------|-------------|
| PST-400C | <i>a</i>                       | 15.2                                        | 819                        | 0.750      | 9.3         |
|          | <i>b</i>                       | 15.3                                        | 823                        | 0.743      | 9.4         |
|          | <i>c</i>                       | 15.4                                        | 819                        | 0.733      | 9.2         |
|          | average                        | 15.3±0.2                                    | 820±5                      | 0.742±0.02 | 9.3±0.2     |
| 18NR-AO  | <i>a</i>                       | 15.1                                        | 799                        | 0.760      | 9.2         |
|          | <i>b</i>                       | 15.3                                        | 795                        | 0.749      | 9.1         |
|          | <i>c</i>                       | 15.0                                        | 800                        | 0.763      | 9.2         |
|          | average                        | 15.1±0.3                                    | 798±5                      | 0.757±0.01 | 9.2±0.1     |
| R/SP     | <i>a</i>                       | 14.7                                        | 813                        | 0.762      | 9.1         |
|          | <i>b</i>                       | 15.2                                        | 816                        | 0.731      | 9.1         |
|          | <i>c</i>                       | 14.6                                        | 823                        | 0.747      | 9.0         |
|          | average                        | 14.8±0.6                                    | 817±10                     | 0.747±0.03 | 9.1±0.1     |
| ED20     | <i>a</i>                       | 15.3                                        | 803                        | 0.754      | 9.3         |
|          | <i>b</i>                       | 15.5                                        | 806                        | 0.755      | 9.4         |
|          | <i>c</i>                       | 15.6                                        | 801                        | 0.740      | 9.2         |
|          | average                        | 15.5±0.3                                    | 803±5                      | 0.750±0.02 | 9.3±0.2     |

<sup>a</sup> All TiO<sub>2</sub> working electrodes (labeled as *a-c*) were fabricated under the same experimental conditions; the uncertainties represent one standard deviation.

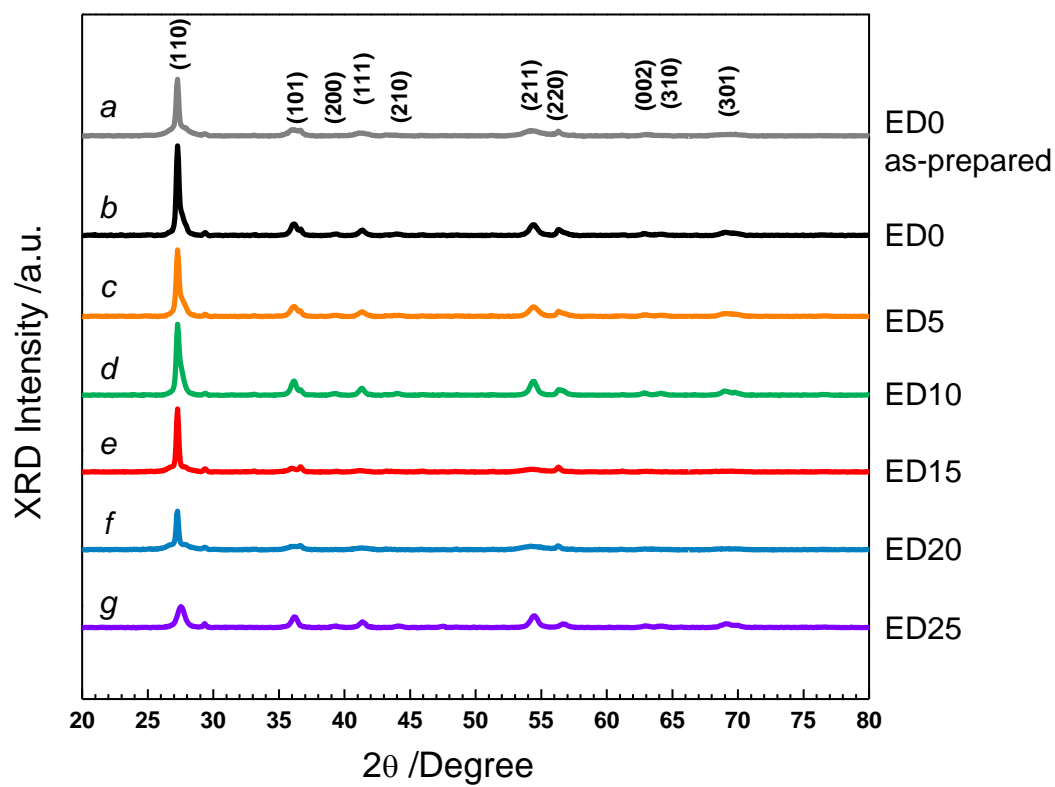

**Figure S1.** XRD patterns of TiO<sub>2</sub> dandelion-like hierarchical rutile spheres (DHRS) of ED0, ED5, ED10, ED15, ED20 and ED25 shown as traces *a-g*. Trace *a* represents ED0 as prepared without annealing and traces *b-g* represent ED0-ED25 with annealing at 500 °C for 30 min.

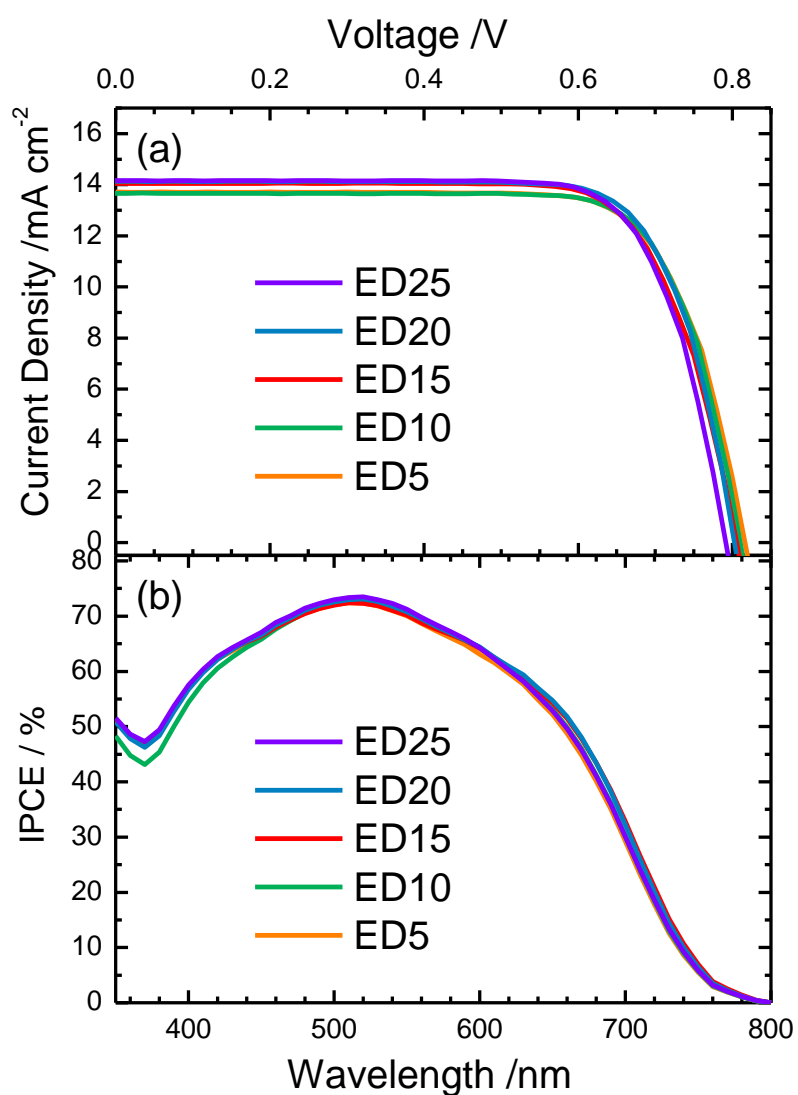

**Figure S2.** (a) current-voltage characteristics and (b) corresponding IPCE action spectra of devices with Z907 made of various TiO<sub>2</sub> DHRS scatter pastes, ED25, ED20, ED15, ED10 and ED5 with the same double-layer structural TiO<sub>2</sub> films (14+5 μm) fabricated under the same conditions and one-sun AM-1.5G irradiation.

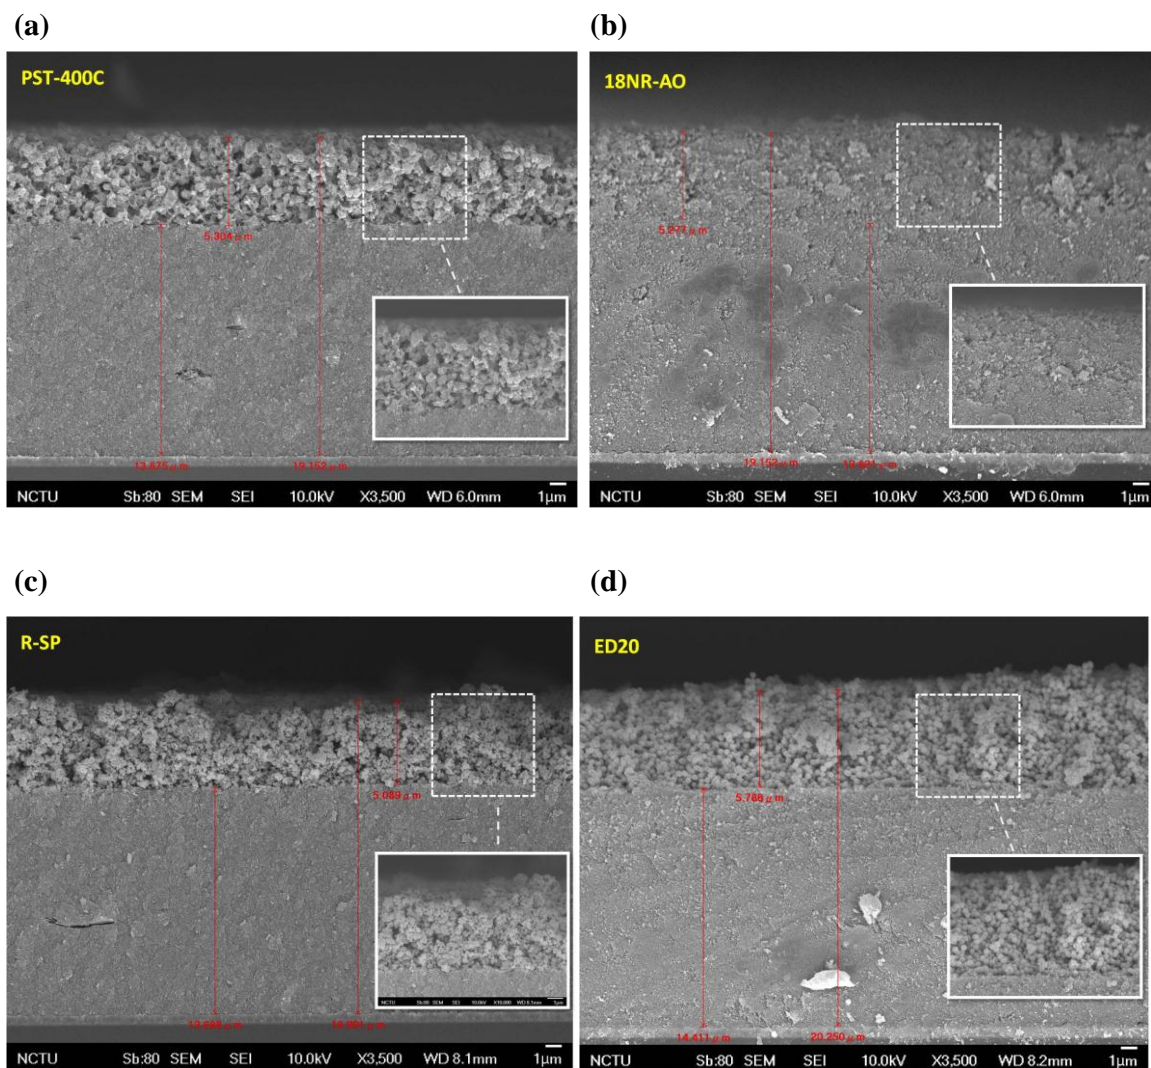

**Figure S3.** Side-view SEM images of the TiO<sub>2</sub> films with varied LSL of (a) PST-400C, (b) 18NR-AO, (c) R/SP and (d) ED20 coated on top of a transparent TiO<sub>2</sub> active layer (AL) showing the double-layer structure with the film thicknesses of ~5 μm and ~14 μm for LSL and AL, respectively.

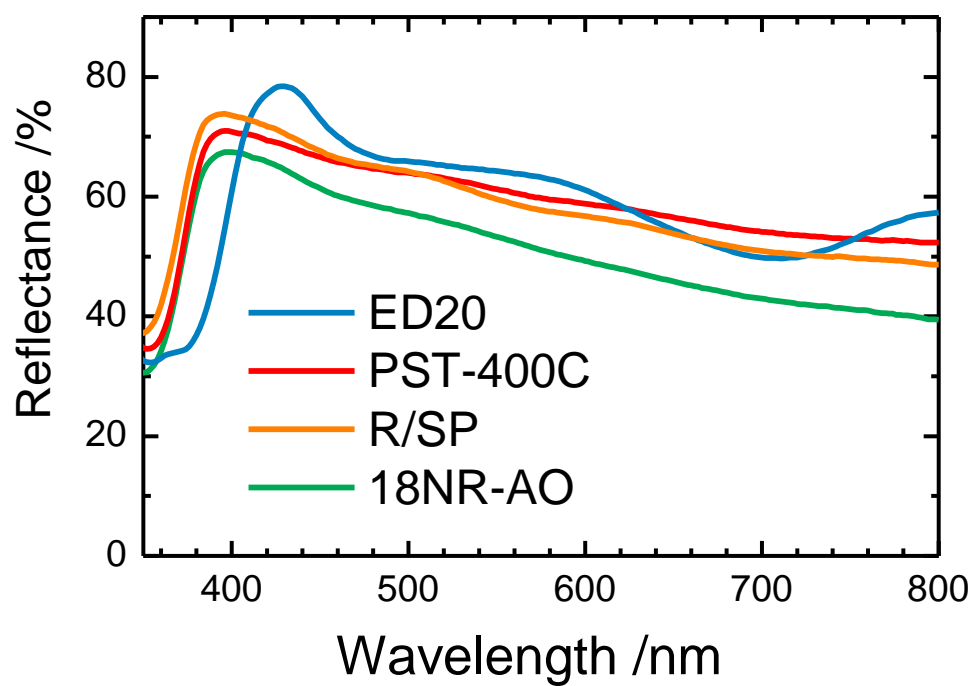

**Figure S4.** Thin-film reflectance spectra of ED20, PST-400C, R/SP and 18NR-AO.
